# Supplementary material for: Methods to discriminate primary from secondary dengue during acute symptomatic infection
Source: Springer Nature journal article supplement (doi:10.1186/s12879-018-3274-7), 2018-08-07
Supplement: MOESM1 [file 16017330]

## Supplementary Information

**Table S1: Validation of the all-inclusive models**

|                                 | <b>Performance</b> |              |              |            |            |
|---------------------------------|--------------------|--------------|--------------|------------|------------|
|                                 | <b>Accuracy</b>    | <b>Sens.</b> | <b>Spec.</b> | <b>PPV</b> | <b>NPV</b> |
| <b>Bootstrapping validation</b> |                    |              |              |            |            |
| Panbio Indirect IgG             | 0.90               | 0.85         | 0.93         | 0.75       | 0.83       |
| In-house capture IgG            | 0.86               | 0.84         | 0.87         | 0.80       | 0.85       |
| In-house capture IgM/IgG ratio  | 0.88               | 0.84         | 0.90         | 0.77       | 0.84       |
| <b>Temporal validation</b>      |                    |              |              |            |            |
| Panbio Indirect IgG             | 0.83               | 0.88         | 0.77         | 0.82       | 0.85       |
| In-house capture IgG            | 0.80               | 0.86         | 0.75         | 0.80       | 0.80       |
| In-house capture IgM/IgG ratio  | 0.82               | 0.86         | 0.78         | 0.82       | 0.81       |
